# Supplementary material for: A Renewed Appreciation of Helicoverpa armigera Nucleopolyhedrovirus BJ (Formerly Helicoverpa assulta Nucleopolyhedrovirus) with Whole Genome Sequencing
Source: MDPI journal article supplement (doi:10.3390/v14030618), 2022-03-16
Supplement: s1 [file s1]

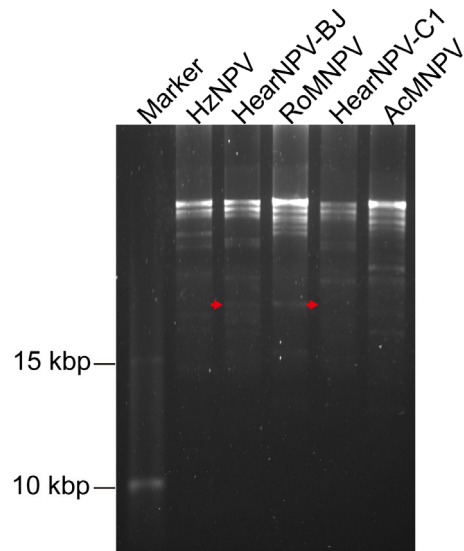

Supplementary Figure S1. Digestion of different nucleopolyhedrovirus genomes. HearNPV-BJ, HzNPV, RoMNPV, HearNPV-C1 and AcMNPV were digested by the same restriction endonucleases: *NdeI*.

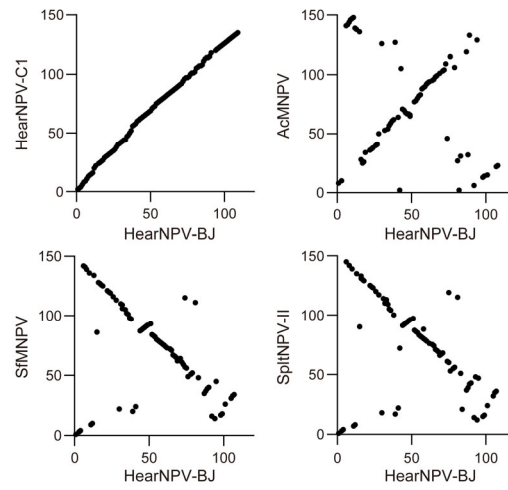

Supplementary Figure S2. Gene parity plots of HearNPV-BJ against other baculoviruses. HearNPV-C1, AcMNPV, SfMNPV and SpltNPV-II were selected for analysis respectively.
